# Supplementary material for: Molecular phylogenetic analysis of nuclear genes suggests a Cenozoic over-water dispersal origin for the Cuban solenodon
Source: PubMed Central journal article supplement (PMC4976362; doi:10.1038/srep31173), 2016-08-08
Supplement: srep31173-s1.pdf [file srep31173-s1.pdf]

## **Supplementary Information**

### **Molecular phylogenetic analysis of nuclear genes suggests a Cenozoic over-water dispersal origin for the Cuban solenodon**

Jun J. Sato, Satoshi D. Ohdachi, Lazaro M. Echenique-Diaz, Rafael Borroto-Páez, Gerardo Begué-Quiala, Jorge L. Delgado-Labañino, Jorgelino Gámez-Díez, José Alvarez-Lemus, Nguyen Truong Son, Nobuyuki Yamaguchi, and Masaki Kita

## Supplementary Figure S1

Maximum likelihood tree of the order Eulipotyphla. The tree was estimated from the GARLI analysis and the negative log-likelihood score was -31415.497726. Intraspecific variations are shown where relevant. The colours of each branch show four families in this order (green, Solenodontidae; blue, Talpidae, red, Erinaceidae; orange, Soricidae). Numbers near each node show bootstrap supports (before slash) and posterior probabilities (after slash) from the ML and BI analyses, respectively. Numbers in bold near each node are node-numbers, which correspond to those in Supplementary Table S2.

# Supplementary Figure S1

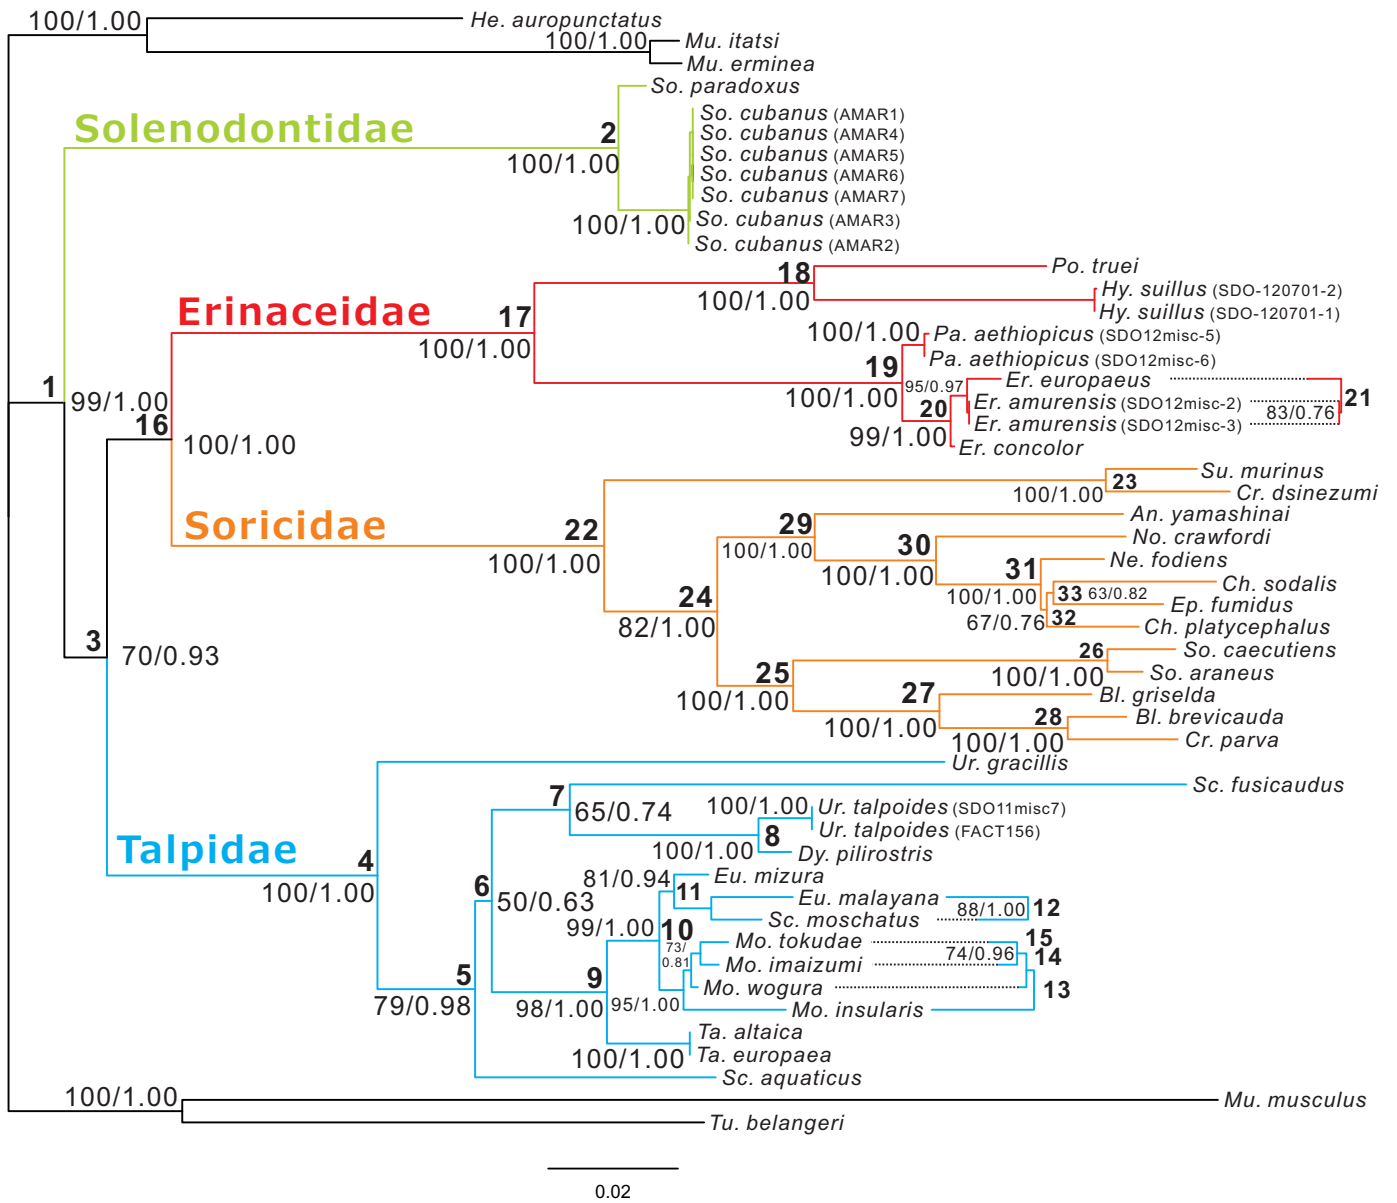

Supplementary Table S1. Species and DNA sequences examined in this study

| Taxon <sup>a</sup>                                           | Voucher number and locality <sup>b</sup> | Accession numbers in the DNA databases |                       |                       |                       |                       |
|--------------------------------------------------------------|------------------------------------------|----------------------------------------|-----------------------|-----------------------|-----------------------|-----------------------|
|                                                              |                                          | <i>Apob</i>                            | <i>Atp7a</i>          | <i>Bdnf</i>           | <i>Brcal</i>          | <i>Ragl</i>           |
| <b>Solenodontidae</b>                                        |                                          |                                        |                       |                       |                       |                       |
| <i>Solenodon cubanus</i> , Cuban solenodon or Almiqui        | AMAR1: AHNP <sup>c</sup> , Cuba          | LC124826 <sup>d</sup>                  | LC124853 <sup>d</sup> | LC124882 <sup>d</sup> | LC124915 <sup>d</sup> | LC124949 <sup>d</sup> |
| <i>Solenodon cubanus</i> , Cuban solenodon or Almiqui        | AMAR2: AHNP <sup>c</sup> , Cuba          | LC124827 <sup>d</sup>                  | LC124854 <sup>d</sup> | LC124883 <sup>d</sup> | LC124916 <sup>d</sup> | LC124950 <sup>d</sup> |
| <i>Solenodon cubanus</i> , Cuban solenodon or Almiqui        | AMAR3: AHNP <sup>c</sup> , Cuba          | LC124828 <sup>d</sup>                  | LC124855 <sup>d</sup> | LC124884 <sup>d</sup> | LC124917 <sup>d</sup> | LC124951 <sup>d</sup> |
| <i>Solenodon cubanus</i> , Cuban solenodon or Almiqui        | AMAR4: AHNP <sup>c</sup> , Cuba          | LC124829 <sup>d</sup>                  | LC124856 <sup>d</sup> | LC124885 <sup>d</sup> | LC124918 <sup>d</sup> | LC124952 <sup>d</sup> |
| <i>Solenodon cubanus</i> , Cuban solenodon or Almiqui        | AMAR5: AHNP <sup>c</sup> , Cuba          | LC124830 <sup>d</sup>                  | LC124857 <sup>d</sup> | LC124886 <sup>d</sup> | LC124919 <sup>d</sup> | LC124953 <sup>d</sup> |
| <i>Solenodon cubanus</i> , Cuban solenodon or Almiqui        | AMAR6: AHNP <sup>c</sup> , Cuba          | LC124831 <sup>d</sup>                  | LC124858 <sup>d</sup> | LC124887 <sup>d</sup> | LC124920 <sup>d</sup> | LC124954 <sup>d</sup> |
| <i>Solenodon cubanus</i> , Cuban solenodon or Almiqui        | AMAR7: AHNP <sup>c</sup> , Cuba          | LC124832 <sup>d</sup>                  | LC124859 <sup>d</sup> | LC124888 <sup>d</sup> | LC124921 <sup>d</sup> | LC124955 <sup>d</sup> |
| <i>Solenodon paradoxus</i> , Hispaniolan solenodon           | From Database                            | JN414026 <sup>e</sup>                  | AY530069 <sup>h</sup> | AY530070 <sup>h</sup> | AY530080 <sup>h</sup> | -                     |
| <b>Erinaceidae</b>                                           |                                          |                                        |                       |                       |                       |                       |
| <b>Erinaceinae</b>                                           |                                          |                                        |                       |                       |                       |                       |
| <i>Erinaceus amurensis</i> , Amur hedgehog                   | SDO12misc-2: Shizuoka, Japan             | LC124833 <sup>d</sup>                  | LC124860 <sup>d</sup> | LC124889 <sup>d</sup> | LC124922 <sup>d</sup> | LC124956 <sup>d</sup> |
| <i>Erinaceus amurensis</i> , Amur hedgehog                   | SDO12misc-3: Shizuoka, Japan             | LC124834 <sup>d</sup>                  | LC124861 <sup>d</sup> | LC124890 <sup>d</sup> | LC124923 <sup>d</sup> | LC124957 <sup>d</sup> |
| <i>Erinaceus europaeus</i> , West European hedgehog          | From Database                            | JN414024 <sup>e</sup>                  | -                     | -                     | AF284008 <sup>l</sup> | -                     |
| <i>Erinaceus concolor</i> , southern white-breasted hedgehog | From Database                            | -                                      | AY011383 <sup>i</sup> | AY011447 <sup>i</sup> | -                     | AY011871 <sup>i</sup> |
| <i>Paraechinus aethiopicus</i> , desert hedgehog             | QU1: northern Qatar                      | LC124835 <sup>d</sup>                  | LC124862 <sup>d</sup> | LC124891 <sup>d</sup> | LC124924 <sup>d</sup> | LC124958 <sup>d</sup> |
| <i>Paraechinus aethiopicus</i> , desert hedgehog             | QU2: northern Qatar                      | LC124836 <sup>d</sup>                  | LC124863 <sup>d</sup> | LC124892 <sup>d</sup> | LC124925 <sup>d</sup> | LC124959 <sup>d</sup> |
| <b>Galericinae</b>                                           |                                          |                                        |                       |                       |                       |                       |
| <i>Hylomys cf. suillus</i> , short-tailed gymnure            | SDO-120701-1*: northern Vietnam          | LC124837 <sup>d</sup>                  | -                     | LC124893 <sup>d</sup> | LC124926 <sup>d</sup> | LC124960 <sup>d</sup> |
| <i>Hylomys cf. suillus</i> , short-tailed gymnure            | SDO-120702-2*: northern Vietnam          | LC124838 <sup>d</sup>                  | -                     | LC124894 <sup>d</sup> | LC124927 <sup>d</sup> | LC124961 <sup>d</sup> |
| <i>Podogymnura truei</i> , Mindanao gymnure                  | From Database                            | JN414025 <sup>e</sup>                  | JN633737 <sup>e</sup> | JN633375 <sup>e</sup> | -                     | -                     |
| <b>Soricidae</b>                                             |                                          |                                        |                       |                       |                       |                       |
| <b>Crocidurinae</b>                                          |                                          |                                        |                       |                       |                       |                       |
| <i>Crocidura dsinezumi</i> , dsinezumi shrew                 | SDO-11/02/23-2: Yakushima Is., Japan     | -                                      | LC124864 <sup>d</sup> | LC124895 <sup>d</sup> | LC124928 <sup>d</sup> | LC124962 <sup>d</sup> |
| <i>Suncus murinus</i> , Asian house shrew                    | SDO-11/12/7-1: Yonaguni Is., Japan       | -                                      | LC124865 <sup>d</sup> | LC124896 <sup>d</sup> | LC124929 <sup>d</sup> | LC124963 <sup>d</sup> |
| <b>Soricinae</b>                                             |                                          |                                        |                       |                       |                       |                       |
| <i>Anourosorex yamashinai</i> , Taiwanese mole shrew         | SDO-03/3/12-5: Chiayi Country, Taiwan    | LC124839 <sup>d</sup>                  | LC124866 <sup>d</sup> | LC124897 <sup>d</sup> | LC124930 <sup>d</sup> | -                     |
| <i>Blarina brevicauda</i> , northern short-tailed shrew      | SDO-2002/7/25-5: Michigan, USA           | LC124840 <sup>d</sup>                  | LC124867 <sup>d</sup> | LC124898 <sup>d</sup> | LC124931 <sup>d</sup> | LC124964 <sup>d</sup> |

|                                                             |                                       |                       |                       |                       |                       |                       |
|-------------------------------------------------------------|---------------------------------------|-----------------------|-----------------------|-----------------------|-----------------------|-----------------------|
| <i>Blarinella griselda</i> , Indochinese short-tailed shrew | AMNH101610: Mt. Tay Con Linh, Vietnam | LC124841 <sup>d</sup> | LC124868 <sup>d</sup> | LC124899 <sup>d</sup> | LC124932 <sup>d</sup> | LC124965 <sup>d</sup> |
| <i>Chimarrogale platycephalus</i> , Japanese water shrew    | SDO-2001/5/25-1: Aomori Pref., Japan  | LC124842 <sup>d</sup> | LC124869 <sup>d</sup> | LC124900 <sup>d</sup> | LC124933 <sup>d</sup> | -                     |
| <i>Chodsigoa sodalis</i> , lesser Taiwanese shrew           | SDO-02misc74: Chiayi Country, Taiwan  | -                     | LC124870 <sup>d</sup> | LC124901 <sup>d</sup> | LC124934 <sup>d</sup> | -                     |
| <i>Cryptotis parva</i> , North American least shrew         | ASNHC8192: Texas, USA                 | LC124843 <sup>d</sup> | -                     | LC124902 <sup>d</sup> | LC124935 <sup>d</sup> | LC124966 <sup>d</sup> |
| <i>Episoriculus fumidus</i> , Taiwanese brown-toothed shrew | SDO-03/3/11-1: Chiayi Country, Taiwan | -                     | LC124871 <sup>d</sup> | LC124903 <sup>d</sup> | LC124936 <sup>d</sup> | -                     |
| <i>Neomys fodiens</i> , Eurasian water shrew                | SDO95misc-20: Koverhar, S Finland     | -                     | LC124872 <sup>d</sup> | LC124904 <sup>d</sup> | LC124937 <sup>d</sup> | -                     |
| <i>Notiosorex crawfordi</i> , Crawford's gray shrew         | ASNHC10653: Texas, USA                | LC124844 <sup>d</sup> | LC124873 <sup>d</sup> | LC124905 <sup>d</sup> | LC124938 <sup>d</sup> | LC124967 <sup>d</sup> |
| <i>Sorex araneus</i> , common shrew                         | From Database                         | JN414027 <sup>e</sup> | AY011386 <sup>i</sup> | AY011450 <sup>i</sup> | AY057828 <sup>i</sup> | -                     |
| <i>Sorex caecutiens</i> , Laxmann's shrew                   | SDO-100825-1: Hokkaido, Japan         | LC124845 <sup>d</sup> | LC124874 <sup>d</sup> | LC124906 <sup>d</sup> | LC124939 <sup>d</sup> | LC124968 <sup>d</sup> |
| <b>Talpidae</b>                                             |                                       |                       |                       |                       |                       |                       |
| <b>Scalopinae</b>                                           |                                       |                       |                       |                       |                       |                       |
| <i>Scalopus aquaticus</i> , eastern mole                    | From Database                         | -                     | -                     | -                     | AF284007 <sup>1</sup> | -                     |
| <b>Talpinae</b>                                             |                                       |                       |                       |                       |                       |                       |
| <i>Scaptonyx fuscicaudus</i> , long-tailed mole             | From Database                         | -                     | -                     | -                     | -                     | AB106241 <sup>m</sup> |
| <i>Euroscaptor klossi</i> , Kloss's mole                    | From Database                         | -                     | -                     | -                     | -                     | AB185155 <sup>n</sup> |
| <i>Euroscaptor mizura</i> , Japanese mountain mole          | SDO-2001/5/26-2: Aomori, Japan        | LC124846 <sup>d</sup> | LC124875 <sup>d</sup> | LC124907 <sup>d</sup> | LC124940 <sup>d</sup> | LC124969 <sup>d</sup> |
| <i>Mogera imaizumii</i> , small Japanese mole               | From Database                         | -                     | -                     | -                     | -                     | AB106242 <sup>m</sup> |
| <i>Mogera insularis</i> , insular mole                      | From Database                         | -                     | -                     | -                     | -                     | AB176544 <sup>m</sup> |
| <i>Mogera tokudae</i> , Sado mole                           | From Database                         | -                     | -                     | -                     | -                     | AB106243 <sup>m</sup> |
| <i>Mogera wogura</i> , Japanese mole                        | SDO-11/02/24-2: Yakushima Is., Japan  | LC124847 <sup>d</sup> | LC124876 <sup>d</sup> | LC124908 <sup>d</sup> | LC124941 <sup>d</sup> | LC124970 <sup>d</sup> |
| <i>Scaptochirus moschatus</i> , short-faced mole            | From Database                         | -                     | -                     | -                     | -                     | AB353298 <sup>o</sup> |
| <i>Talpa altaica</i> , Altai mole                           | From Database                         | JN414028 <sup>e</sup> | HG738086 <sup>j</sup> | AY011448 <sup>i</sup> | -                     | AB176542 <sup>m</sup> |
| <i>Talpa europaea</i> , European mole                       | From Database                         | AY243373 <sup>f</sup> | -                     | -                     | -                     | -                     |
| <i>Dymecodon pilirostris</i> , True's shrew mole            | SDO-96misc-8: Nagano, Japan           | LC124848 <sup>d</sup> | LC124877 <sup>d</sup> | LC124909 <sup>d</sup> | LC124942 <sup>d</sup> | LC124971 <sup>d</sup> |
| <i>Urotrichus talpoides</i> , Japanese shrew mole           | SDO11misc7: Okayama, Japan            | -                     | LC124878 <sup>d</sup> | LC124910 <sup>d</sup> | LC124943 <sup>d</sup> | LC124972 <sup>d</sup> |
| <i>Urotrichus talpoides</i> , Japanese shrew mole           | FACT156: Fukuyama, Hiroshima, Japan   | -                     | -                     | -                     | LC124944 <sup>d</sup> | LC124973 <sup>d</sup> |
| <b>Uropsilinae</b>                                          |                                       |                       |                       |                       |                       |                       |
| <i>Uropsilus gracilis</i> , gracile shrew mole              | From Database                         | -                     | -                     | -                     | -                     | AB106240 <sup>m</sup> |
| <b>Outgroups</b>                                            |                                       |                       |                       |                       |                       |                       |
| <i>Herpestes auropunctatus</i> , small Asian mongoose       | SDO-12/8/23-2: Grande Comore Island   | LC124849 <sup>d</sup> | -                     | LC124911 <sup>d</sup> | LC124945 <sup>d</sup> | LC124974 <sup>d</sup> |

|                                              |                                      |                                                                                                               |
|----------------------------------------------|--------------------------------------|---------------------------------------------------------------------------------------------------------------|
| <i>Mustela erminea</i> , ermine or stoat     | From Database                        | AB193414 <sup>g</sup> EF987575 <sup>k</sup> EF987619 <sup>k</sup> AB285357 <sup>g</sup> AB109347 <sup>p</sup> |
| <i>Mustela itatsi</i> , Japanese weasel      | SDO-11misc5: Yakushima Is., Japan    | LC124850 <sup>d</sup> LC124879 <sup>d</sup> LC124912 <sup>d</sup> LC124946 <sup>d</sup> LC124975 <sup>d</sup> |
| <i>Mus musculus</i> , house mouse            | SDO-11/02/24-4: Yakushima Is., Japan | LC124851 <sup>d</sup> LC124880 <sup>d</sup> LC124913 <sup>d</sup> LC124947 <sup>d</sup> LC124976 <sup>d</sup> |
| <i>Tupaia belangeri</i> , northern treeshrew | SDO-13/01/16-1*: southern Vietnam    | LC124852 <sup>d</sup> LC124881 <sup>d</sup> LC124914 <sup>d</sup> LC124948 <sup>d</sup> -                     |

<sup>a</sup>: Scientific and common names follow Hutterer (2005).

<sup>b</sup>: Voucher and locality information are provided for new data only (AMAR, collections in the project named Academic Mission of Almiquri Research; SDO, Satoshi D. Ohdachi's personal collections; QU, Qatar University; AMNH, American Museum of Natural History; ASNHC, Angelo State Natural History Collections; FACT, Fukuyama University Animal Cell Technology). \*Samples are deposited at Institute of Ecology and Biological Resources, Vietnam

<sup>c</sup>: Alejandro de Humboldt National Park

<sup>d</sup>: this study

<sup>e</sup>: Meredith, R. W. *et al.* Impacts of the Cretaceous Terrestrial Revolution and KPg extinction on mammal diversification. *Science* **334**, 521-524 (2011).

<sup>f</sup>: Amrine-Madsen, H., Koepfli, K.-P., Wayne, R. K. & Springer, M. S. A new phylogenetic marker, apolipoprotein B, provides compelling evidence for eutherian relationships. *Mol. Phylogenet. Evol.* **28**, 225-240 (2003).

<sup>g</sup>: Sato, J. J. *et al.* Deciphering and dating the red panda's ancestry and early adaptive radiation of Musteloidea. *Mol. Phylogenet. Evol.* **53**, 907-922 (2009).

<sup>h</sup>: Roca, A. L. *et al.* Mesozoic origin for west indian insectivores. *Nature* **429**, 649-651 (2004).

<sup>i</sup>: Murphy, W.J. *et al.* Molecular phylogenetics and the origins of placental mammals. *Nature* **409**, 614-618 (2001).

<sup>j</sup>: He, K., Shinohara, A., Jiang, X.-L. & Campbell, K. L. Multilocus phylogeny of talpine moles (Talpini, Talpidae, Eulipotyphla) and its implications for systematics. *Mol. Phylogenet. Evol.* **70**, 513-521 (2014).

<sup>k</sup>: Koepfli, K.-P. *et al.* Multigene phylogeny of the Mustelidae: resolving relationships, tempo and biogeographic history of a mammalian adaptive radiation. *BMC Biology* **6**, 10 (2008).

<sup>l</sup>: Madsen, O. *et al.* Parallel adaptive radiations in two major clades of placental mammals. *Nature* **409**, 610-614 (2001).

<sup>m</sup>: Shinohara, A. *et al.* Evolution and Biogeography of Talpid Moles from Continental East Asia and the Japanese Islands Inferred from Mitochondrial and Nuclear Gene Sequences. *Zoolog. Sci.* **21**, 1177-1185 (2004).

<sup>n</sup>: Kawada, S., Shinohara, A., Yasuda, M., Oda, S. & Liat, L. B. The mole of Peninsular Malaysia: notes on its identification and ecology. *Mamm. Study* **28**, 73-77 (2003).

<sup>o</sup>: Shinohara, A. *et al.* Phylogenetic relationships of the short-faced mole, *Scaptochirus moschatus* (Mammalia: Eulipotyphla), among Eurasian fossorial moles, as inferred from mitochondrial and nuclear gene sequences. *Mamm. Study* **33**, 77-82 (2008).

Supplementary Table S2. Time to the most recent common ancestor (TMRCA) and 95 Credibility interval of each clade in the eulipotyphlan phylogeny (Supplementary Fig. 1)

| clade                                                                     | TMRCA (MYA)            |                        |                        |
|---------------------------------------------------------------------------|------------------------|------------------------|------------------------|
|                                                                           | strategy [1]           | strategy [2]           | strategy [3]           |
| 1_Eulipotyphla                                                            | 58.6 (57.3-60.8)       | 75.7 (74.5-76.9)       | 75.9 (74.7-77.1)       |
| 2_Solenodontidae                                                          | 3.7 (2.6-5.0)          | 4.8 (3.3-6.4)          | 4.6 (3.1-6.0)          |
| 3_Talpidae-Soricidae-Erinaceidae                                          | 58.6 (57.3-60.8)       | 74.2 (64.4-77.4)*(64)  | 75.9 (74.7-77.1)       |
| 4_Talpidae                                                                | 35.4 (34.2-38.5)*(137) | 36.2 (34.2-43.2)*(121) | 29.3 (20.3-42.9)*(114) |
| 5_Talpinae-Scalopinae                                                     | 35.0 (34.3-35.9)       | 35.1 (34.3-36.1)       | 23.7 (19.3-28.6)*(193) |
| 6_Talpinae                                                                | 19.8 (16.1-23.5)       | 25.2 (20.9-29.2)       | 21.7 (17.9-25.1)       |
| 7_Scaptonyx-Dimecodon-Urotrichus                                          | 14.3 (8.0-20.5)*(188)  | 18.2 (9.9-26.2)*(183)  | 17.8 (10.0-24.7)*(147) |
| 8_Dimecodon-Urotrichus                                                    | 2.3 (1.3-3.5)          | 2.9 (1.5-4.4)          | 2.7 (1.6-4.1)          |
| 9_Talpa-Mogera-Eurosaotor-Scaptochirus                                    | 7.1 (5.2-9.2)          | 9.0 (6.7-11.8)         | 8.5 (6.2-11.0)         |
| 10_Mogera-Eurosaotor-Scaptochirus                                         | 3.7 (2.5-5.1)          | 4.8 (3.2-6.5)          | 4.5 (3.0-6.1)          |
| 11_Eurosaotor-Scaptochirus                                                | 2.9 (1.2-4.8)          | 3.7 (1.3-5.9)          | 3.4 (1.3-5.7)*(192)    |
| 12_E.malayana-S.moschatus                                                 | 1.7 (0.4-3.2)          | 2.2 (0.4-4.1)          | 2.1 (0.5-3.8)          |
| 13_Mogera                                                                 | 2.0 (0.9-3.3)          | 2.6 (1.0-4.3)          | 2.3 (0.8-4.0)          |
| 14_M.imaizumi-M.tokudae-M.wogura                                          | 1.4 (0.3-2.6)          | 1.8 (0.5-3.4)          | 1.7 (0.3-3.1)          |
| 15_M.imaizumi-M.tokudae                                                   | 0.8 (0.1-1.7)          | 1.0 (0.1-2.3)          | 1.0 (0.1-2.1)          |
| 16_Erinaceidae-Soricidae                                                  | 58.5 (57.3-60.4)       | 73.0 (59.6-77.3)*(63)  | 75.9 (74.7-77.1)       |
| 17_Erinaceidae                                                            | 39.6 (38.1-41.5)       | 41.4 (38.4-45.0)       | 40.3 (35.0-46.0)       |
| 18_Galericinae                                                            | 18.7 (13.6-24.0)       | 21.3 (15.9-26.5)       | 20.6 (15.1-26.4)       |
| 19_Erinaceinae                                                            | 3.9 (2.9-5.1)          | 4.9 (3.6-6.4)          | 4.7 (3.3-6.1)          |
| 20_Erinaceus                                                              | 1.1 (0.6-1.8)          | 1.4 (0.7-2.1)          | 1.3 (0.7-2.0)          |
| 21_E.amurensis-E.europaeus                                                | 1.0 (0.6-1.6)          | 1.3 (0.7-1.9)          | 1.2 (0.7-1.8)          |
| 22_Soricidae                                                              | 34.3 (29.9-38.5)       | 44.1 (36.8-50.4)*(105) | 48.0 (42.3-53.8)       |
| 23_Crociturinae                                                           | 6.0 (4.0-8.0)          | 7.8 (5.2-10.3)         | 7.9 (5.6-10.4)         |
| 24_Soricinae                                                              | 26.5 (23.5-29.7)*(124) | 34.0 (29.6-38.1)*(99)  | 35.0 (31.3-38.7)       |
| 25_B.brevicauda-C.parva-B.griselda-Sorex                                  | 22.5 (19.6-25.5)*(152) | 28.9 (24.8-32.9)*(111) | 30.0 (26.3-33.5)       |
| 26_Sorex                                                                  | 3.4 (2.2-4.9)          | 4.3 (2.8-6.0)          | 4.2 (2.7-5.8)          |
| 27_B.brevicauda-C.parva-B.griselda                                        | 12.8 (10.4-15.4)       | 16.4 (13.4-19.5)       | 16.6 (13.6-19.5)       |
| 28_B.brevicauda-C.parva                                                   | 5.8 (4.2-7.5)          | 7.3 (5.3-9.4)          | 7.3 (5.4-9.3)          |
| 29_C.sodalis-E.fumidus-C.platycephalus-N.fodiens-N.crawfordi-A.yamashinai | 21.3 (18.5-24.4)*(165) | 27.3 (23.4-31.2)*(141) | 27.9 (24.2-31.8)       |
| 30_C.sodalis-E.fumidus-C.platycephalus-N.fodiens-N.crawfordi              | 14.6 (12.2-17.3)*(186) | 18.4 (15.4-21.5)       | 18.5 (15.4-21.5)       |
| 31_C.sodalis-E.fumidus-C.platycephalus-N.fodiens                          | 8.5 (6.7-10.5)*(153)   | 10.6 (8.4-12.9)*(163)  | 10.4 (8.2-12.7)*(175)  |
| 32_C.sodalis-E.fumidus-C.platycephalus                                    | 8.3 (6.5-10.3)*(160)   | 10.3 (8.1-12.7)*(172)  | 10.1 (7.9-12.3)*(187)  |
| 33_C.sodalis-E.fumidus                                                    | 8.0 (6.0-10.0)*(188)   | 10.0 (7.5-12.5)        | 9.8 (7.4-12.3)         |

\*: ESS < 200 and each ESS is shown in the parenthesis after each asterisk

Supplementary Table S3. Primers adopted in the PCR and DNA sequencing.

| Gene         | Primers           |                             | Sequence (5' to 3')                     | References                             |
|--------------|-------------------|-----------------------------|-----------------------------------------|----------------------------------------|
|              | Name              | 1st/2nd PCR Forward/Reverse |                                         |                                        |
| <i>ApoB</i>  | 187F              | 1st and 2nd Forward         | GTG CCA GGT TCA ATC AGT ATA AGT         | Amrine-Madsen et al. (2003)            |
|              | APOB-F9214-Eri    | 2nd Forward                 | CCA GCT CTG GGA AAC ATT ACC TG          | this study                             |
|              | APOB-F9287        | 2nd Forward                 | TAT AAC CAG TCA GAT ATT GTT GCT         | Sato et al. (2006)                     |
|              | APOB-F8830-Sori   | 2nd Forward                 | CAG GCA AGT TGA GAA AGT CAG             | this study                             |
|              | APOB-R8922-Sori   | 2nd Reverse                 | GCC TGG AAT TTG AAA GGT CCT TGG         | this study                             |
|              | APOB-R9324        | 2nd Reverse                 | GGT GCC CTC TAA TTT GTA CTG CAG         | Sato et al. (2006)                     |
|              | APOB-R9600-Eri    | 2nd Reverse                 | CCT GTG GCA GTG GTG TAC ACT CT          | this study                             |
|              | J1R               | 1st and 2nd Reverse         | CCA GCA AAA TTT TCT TTT ACT TCA A       | Jiang et al. (1998)                    |
| <i>Atp7a</i> | ATP7A-Fw          | 1st Forward                 | TCC CTG GAC AAT CAA GAA GC              | Murphy et al. (2001)                   |
|              | ATP7A-Rv          | 1st Reverse                 | AAG GTA GCA TCA AAT CCC ATG T           | Murphy et al. (2001)                   |
| <i>Bdnf</i>  | BDNF-Fw           | 1st Forward                 | CAT CCT TTT CCT TAC TAT GGT T           | Murphy et al. (2001)                   |
|              | BDNF-Rv           | 1st Reverse                 | TTC CAG TGC CTT TTG TCT ATG             | Murphy et al. (2001)                   |
| <i>Brca1</i> | BRCA1-F997        | 1st and 2nd Forward         | GAG AAC AGC AGT TTA TTA CTC AC          | Sato et al. (2009)                     |
|              | BRCA1-F1428       | 2nd Forward                 | AGA CTT AAT GGC CAG TGA TCC TC          | Sato et al. (2009)                     |
|              | BRCA1-R1509       | 2nd Reverse                 | AGG CTT GCC TTC CTC CGA TAG GT          | Sato et al. (2009)                     |
|              | BRCA1-R2047       | 1st and 2nd Reverse         | CAT CTC TTC ACT GCT AGA ACA AC          | Sato et al. (2009)                     |
| <i>Rag1</i>  | RAG1-F1842        | 1st and 2nd Forward         | GCT TTG ATG GAC ATG GAA GAA GAC AT      | Teeling et al. (2000, their RAG1F1705) |
|              | RAG1-F2357        | 2nd Forward                 | AGC CTC CCA AAA TCT TGT CTT CCA CTC CA  | Sato et al. (2004)                     |
|              | RAG1-F2357-Cro    | 2nd Forward                 | GGCCTCGCAGAATCTGGTCTTCCATTCCA           | this study                             |
|              | RAG1-R2388-CroEri | 2nd Reverse                 | GGG TTG GAA CGC CAG ACC TCA TAG C       | this study                             |
|              | RAG1-R2486        | 2nd Reverse                 | AAT GTC ACA GTG AAG GGC ATC TAT GGA AGG | Sato et al. (2004)                     |
|              | RAG1-R2951        | 1st and 2nd Reverse         | GAG CCA TCC CTC TCA ATA ATT TCA GG      | Teeling et al. (2000, their RAG1R2864) |
